# Supplementary material for: Ultrasensitive detection of trinitrotoluene by Fe3O4@mTiO2/P-ATP-TNT/Au@Ag SERS sensor via synergetic effect
Source: Royal Society of Chemistry journal article supplement (doi:10.1039/c8ay02811g), 2019-01-01
Supplement: c8ay02811g1.pdf [file c8ay02811g1.pdf]

## Supporting Information

### Ultrasensitive detection of Trinitrotoluene by $\text{Fe}_3\text{O}_4@\text{mTiO}_2/\text{P-ATP-TNT}/\text{Au}@Ag$ SERS sensor via synergetic effect

Mei Sun<sup>‡a,b,c,d</sup>, Ping Chen<sup>‡a,b,d</sup>, Aiwu Zhao<sup>a,b,d\*</sup>, Fangtao Zuo<sup>a,b,d</sup>.

<sup>a</sup> Institute of Intelligent Machines, Chinese Academy of Sciences, Hefei, 230031, P. R. China.

<sup>b</sup> University of Science and Technology of China, Hefei, 230026, Anhui, P. R. China

<sup>c</sup> School of Materials and Chemical Engineering of Anhui Jianzhu University, Hefei, 230601, P. R. China.

<sup>d</sup> State Key Laboratory of Transducer Technology, Chinese Academy of Sciences, Hefei, 230031, P. R. China

E-mail: [awzhao@iim.ac.cn](mailto:awzhao@iim.ac.cn)

<sup>‡</sup> These authors contributed equally to this work.

### Materials

Ferric (III) chloride hexahydrate ( $\text{FeCl}_3 \cdot 6\text{H}_2\text{O}$ ), tetrachloroauric acid tetrahydrate ( $\text{HAuCl}_4 \cdot 4\text{H}_2\text{O}$ ), silver nitrate ( $\text{AgNO}_3$ ), trisodium citrate dihydrate ( $\text{C}_6\text{H}_5\text{Na}_3\text{O}_7$ ), polyethylene glycol (PEG), sodium acetate anhydrous (NaAc) and ethylene glycoethanol (EG) were obtained from Shanghai Chemical Reagents Company (Shanghai, China). P-aminothiophenol (P-ATP) was purchased from Aladdin. 2,4,6-Trinitrotoluene (TNT) was supplied by National Security Department of China. The deionized (DI) water with a electrical resistivity of 18.25  $\text{M}\Omega\cdot\text{cm}$  was purified using a Millipore Milli-Q gradient system.

### Instrumentation and Characterization

The characterization of the products were analyzed by using a Quanta 200 FEG field

emission scanning electronic microscope (FESEM), a JEOL JEM-2010 high-resolution transmission electron microscope (HRTEM), a Philips X-Pert Pro X-ray diffractometer (XRD) with Cu K $\alpha$  radiation ( $\lambda = 1.5418 \text{ \AA}$ ), The SERS substrates of the P-ATP by using a portable-Raman spectrometer (B&W TEK, i-Raman) equipped with a diode laser emitting at 785 nm, the laser power was 30 mW and the integration time was 5 s.

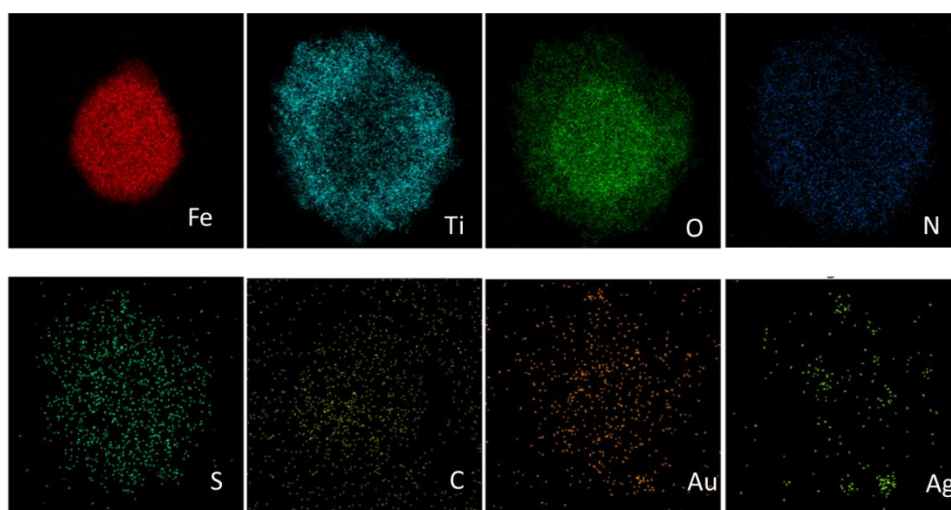

**Fig. S1** elemental distribution mappings of Fe<sub>3</sub>O<sub>4</sub>@mTiO<sub>2</sub>/P-ATP/Au@Ag NPs

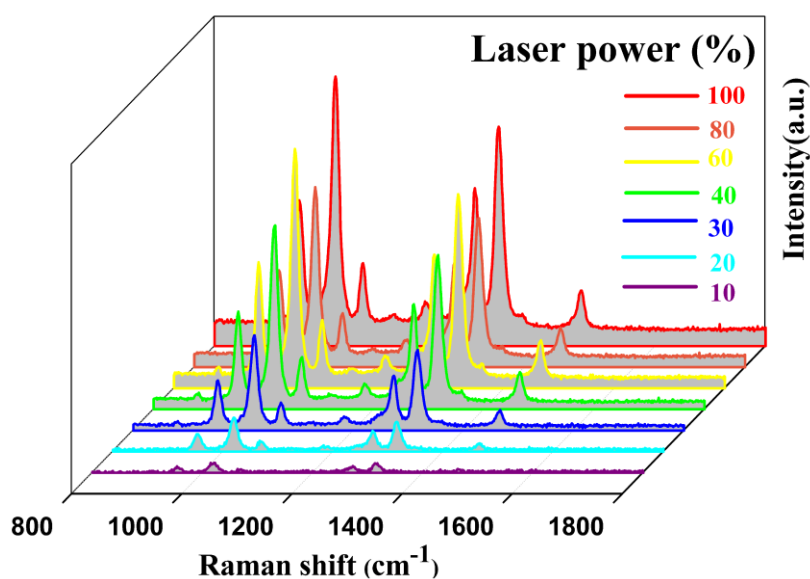

**Fig. S2** SERS spectra of P-ATP at various laser powers in Fe<sub>3</sub>O<sub>4</sub>@mTiO<sub>2</sub>/P-ATP/Au@Ag assemblies

**Table S1.** Wavenumbers and assignments of Raman band of P-ATP and DMAB.

| P-ATP                          |                       | DMAB                           |                                        |
|--------------------------------|-----------------------|--------------------------------|----------------------------------------|
| wavenumber (cm <sup>-1</sup> ) | assignment            | wavenumber (cm <sup>-1</sup> ) | assignment                             |
| <b>1078</b>                    | <b>v<sub>CS</sub></b> | <b>1078</b>                    | <b>v<sub>CS</sub></b>                  |
| <b>1181</b>                    | <b>v<sub>CH</sub></b> | <b>1141</b>                    | <b>β<sub>CH</sub> + v<sub>CN</sub></b> |
| <b>1595</b>                    | <b>v<sub>CC</sub></b> | <b>1181</b>                    | <b>v<sub>CH</sub></b>                  |
|                                |                       | <b>1388</b>                    | <b>v<sub>NN</sub> + v<sub>CN</sub></b> |
|                                |                       | <b>1429</b>                    | <b>v<sub>NN</sub> + β<sub>CH</sub></b> |
|                                |                       | <b>1595</b>                    | <b>v<sub>CC</sub></b>                  |

Abbreviations: v, stretching; β, in-plane bending.
